# Supplementary material for: A Post-Processing Algorithm for miRNA Microarray Data
Source: MDPI journal article supplement (doi:10.3390/ijms21041228), 2020-02-12

**Figure 1.** Scatter plot showing joint distribution of median expression values for all miRNAs from microarray and miRNA-seq data of 12 blood plasma samples. The logarithm base 2 was utilized.

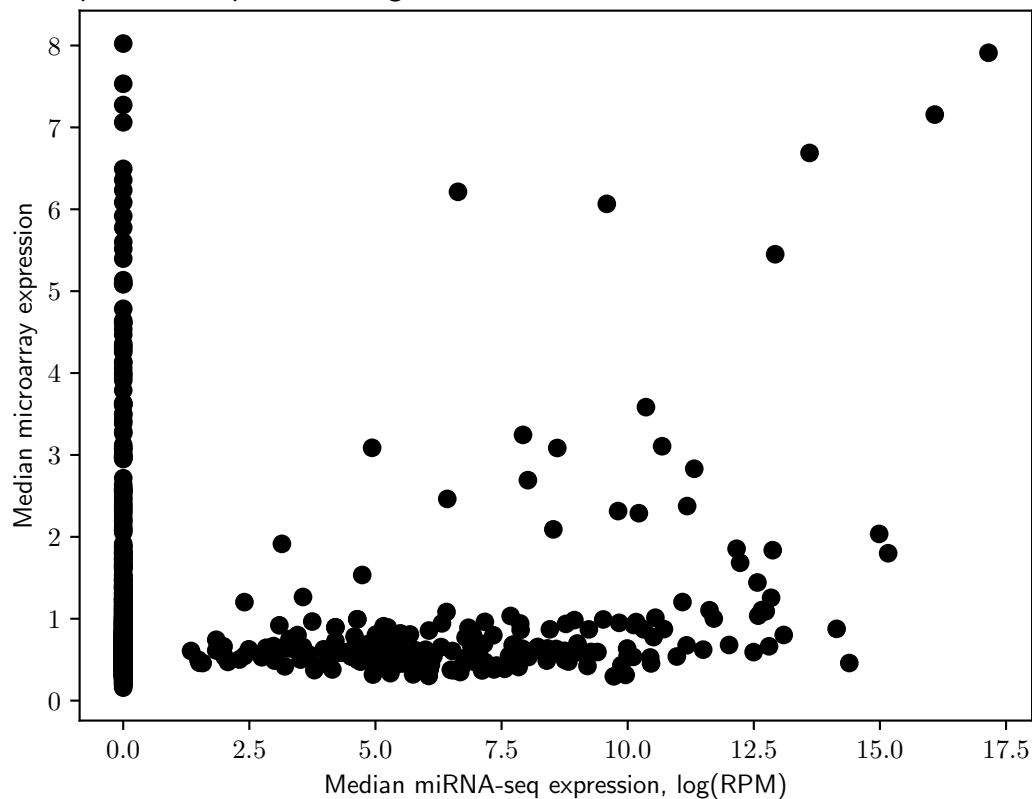

Supplement: s1 [file s1]
